# Supplementary material for: Controlled synthesis of P-Co3O4@NiCo-LDH/NF nanoarrays as binder-free electrodes for water splitting
Source: Royal Society of Chemistry journal article supplement (doi:10.1039/d1dt01883c), 2021-01-01
Supplement: d1dt01883c1.pdf [file d1dt01883c1.pdf]

**Controlled synthesis of P-Co<sub>3</sub>O<sub>4</sub>@NiCo-LDH/NF nanoarrays as binder-free electrodes for water splitting**

Xiaoqiang Du<sup>a\*</sup>, Zhixin Dai<sup>a</sup>, Yanhong Wang<sup>a</sup>, Xinghua Han<sup>a</sup> and Xiaoshuang Zhang<sup>b</sup>

<sup>a</sup>School of Chemical Engineering and Technology, North University of China, Xueyuan road 3, Taiyuan 030051, People's Republic of China. E-mail: duxq16@nuc.edu.cn

<sup>b</sup>School of Science, North University of China, Xueyuan road 3, Taiyuan 030051, People's Republic of China.

**DFT calculation**

In this work, the Cambridge Serial Total Energy Package module of Materials Studio was employed for DFT calculation. The interactions of electrons were assessed by the generalized gradient approximation functions of Perdew-Burke-Emzerh (GGA-PBE). The (003) and (111) plane optimal structures of NiOOH and P-Co<sub>3</sub>O<sub>4</sub> were calculated by setting a cutoff energy of 500 eV and 7×7×1 k-points grid. The structures were also optimized for energy and force convergence choosing as 2.0×10<sup>-5</sup> eV/atom and 0.05 eV/Å, respectively. The vacuum space was up to 0.002 Å to eliminate periodic interactions.

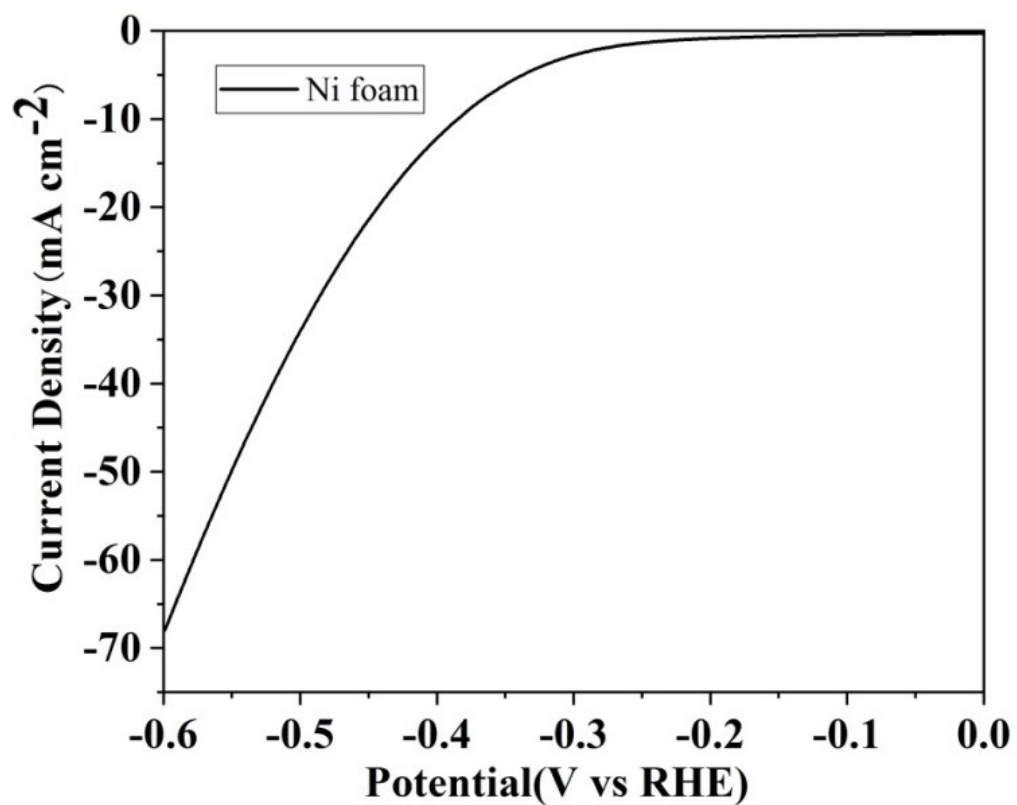

**Fig. S1** Polarization curves of NF in 1.0 M KOH at a potential sweep rate of 5 mV s<sup>-1</sup>.

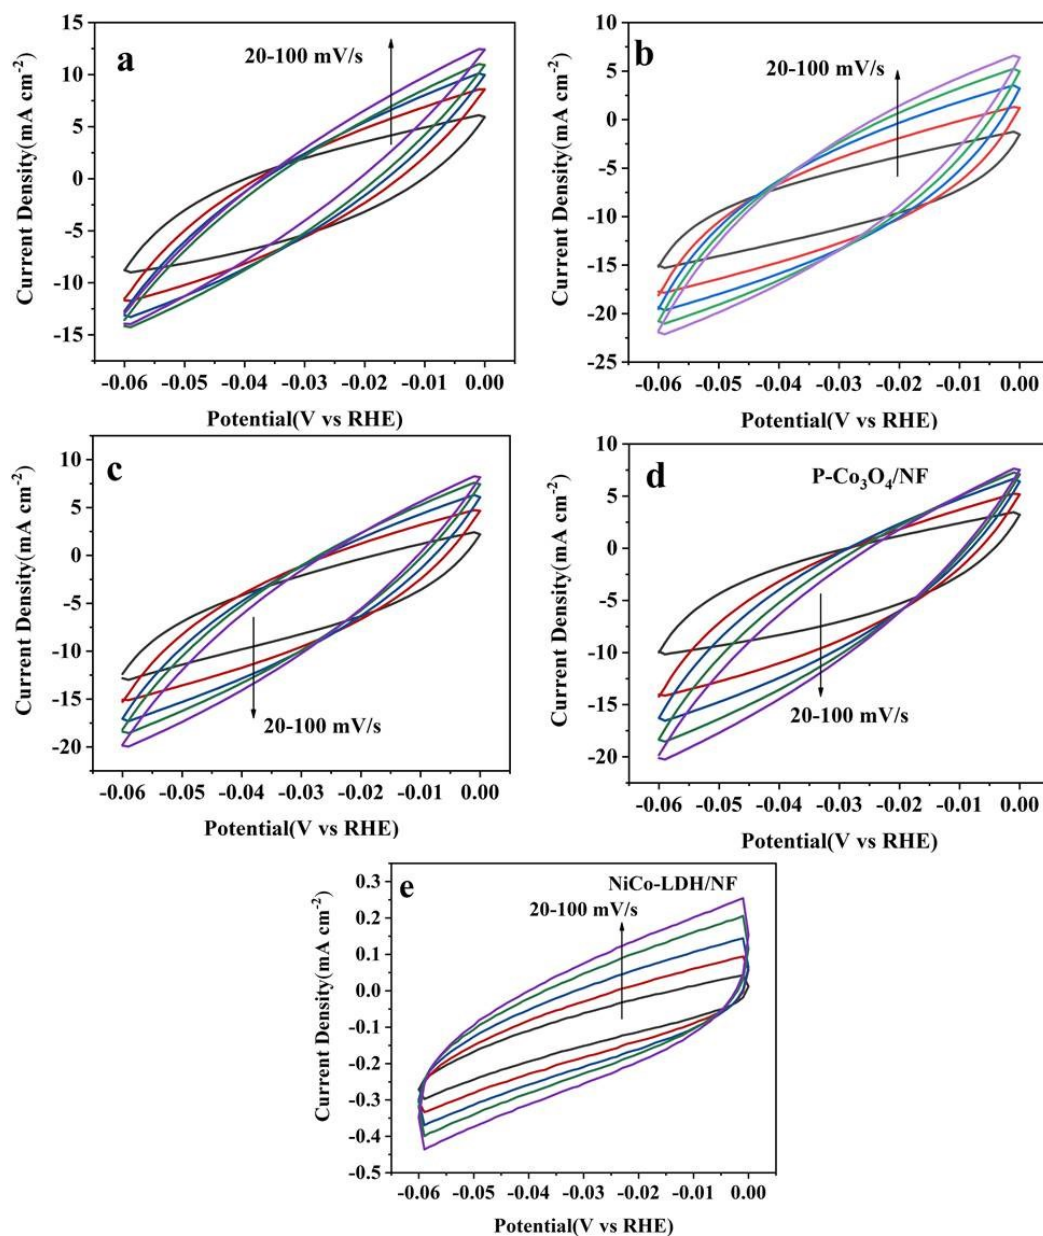

**Fig. S2** CVs of P-Co<sub>3</sub>O<sub>4</sub>@NiCo-LDH-1/NF, P-Co<sub>3</sub>O<sub>4</sub>@NiCo-LDH-2/NF, P-Co<sub>3</sub>O<sub>4</sub>@NiCo-LDH-3/NF, P-Co<sub>3</sub>O<sub>4</sub>/NF and NiCo-LDH/NF.

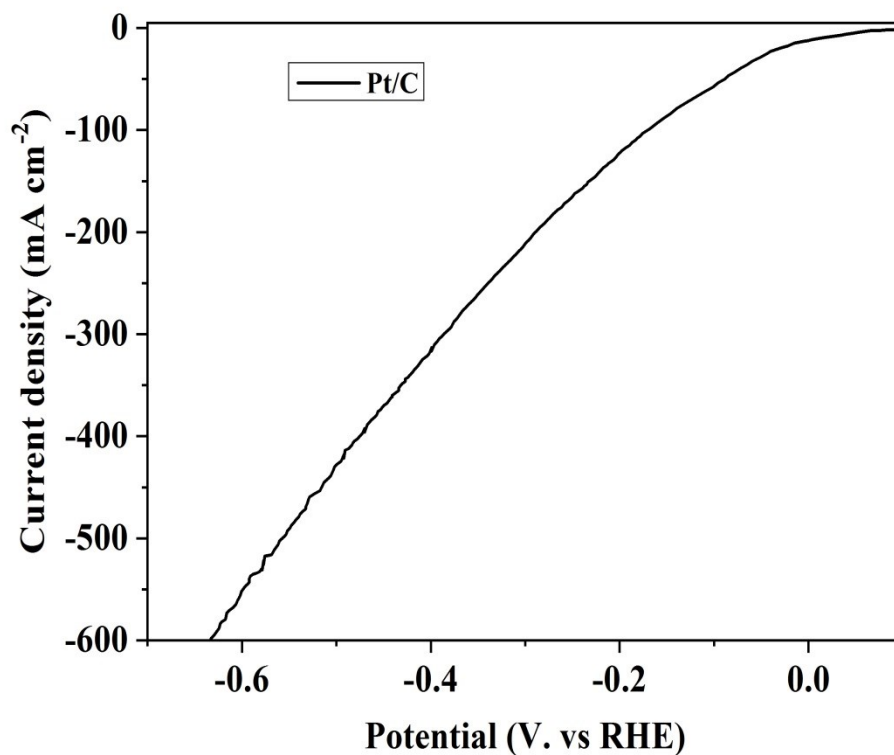

**Fig. S3** Polarization curve of the Pt/C for HER with a scan rate of 5 mV s<sup>-1</sup> in 1 M KOH.

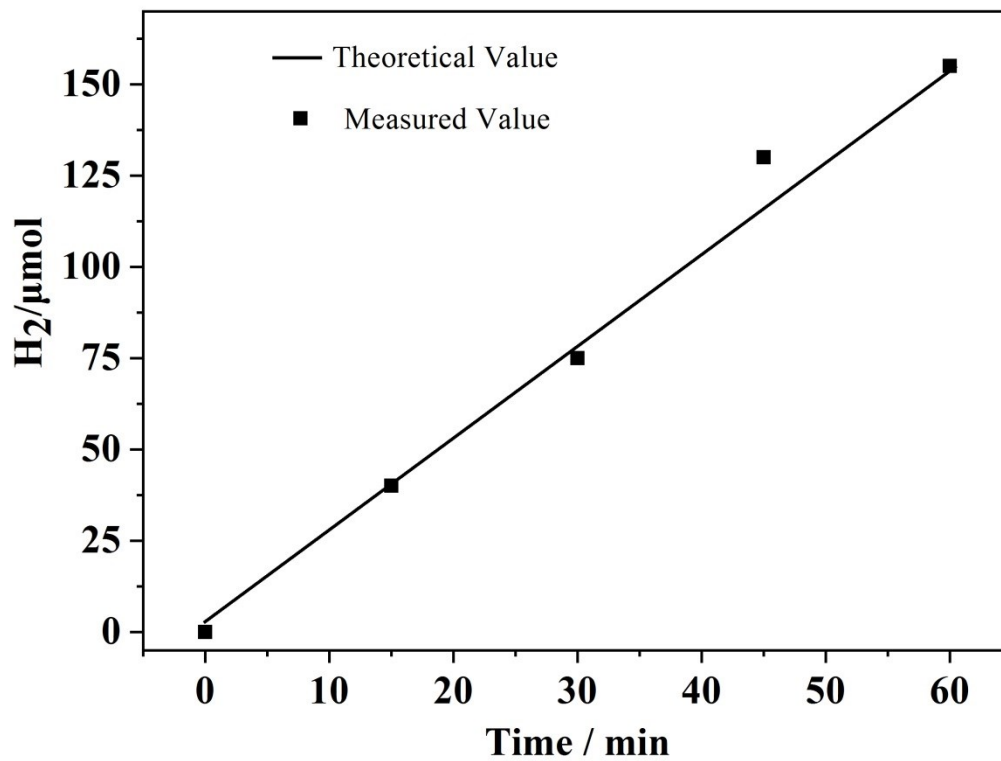

**Fig. S4** Electrocatalytic efficiency of H<sub>2</sub> production over P-Co<sub>3</sub>O<sub>4</sub>@NiCo-LDH-2 /NF.

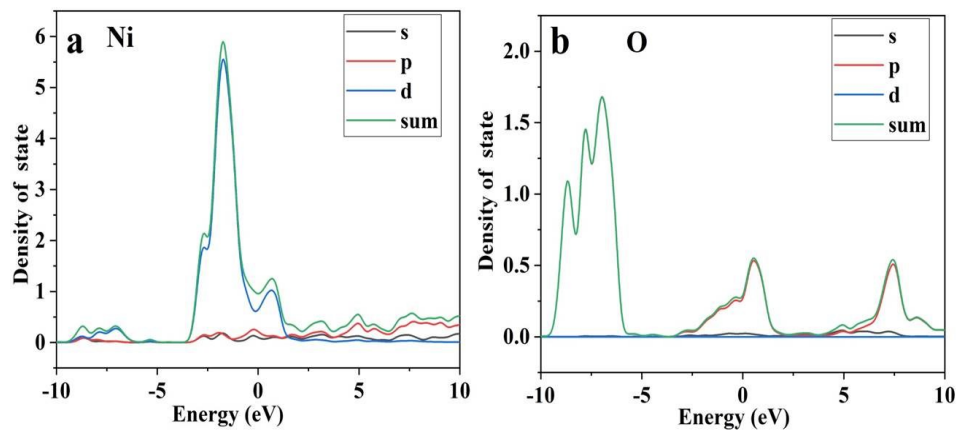

**Fig. S5** Density of states for NiOOH, (a) Ni and (b) O.

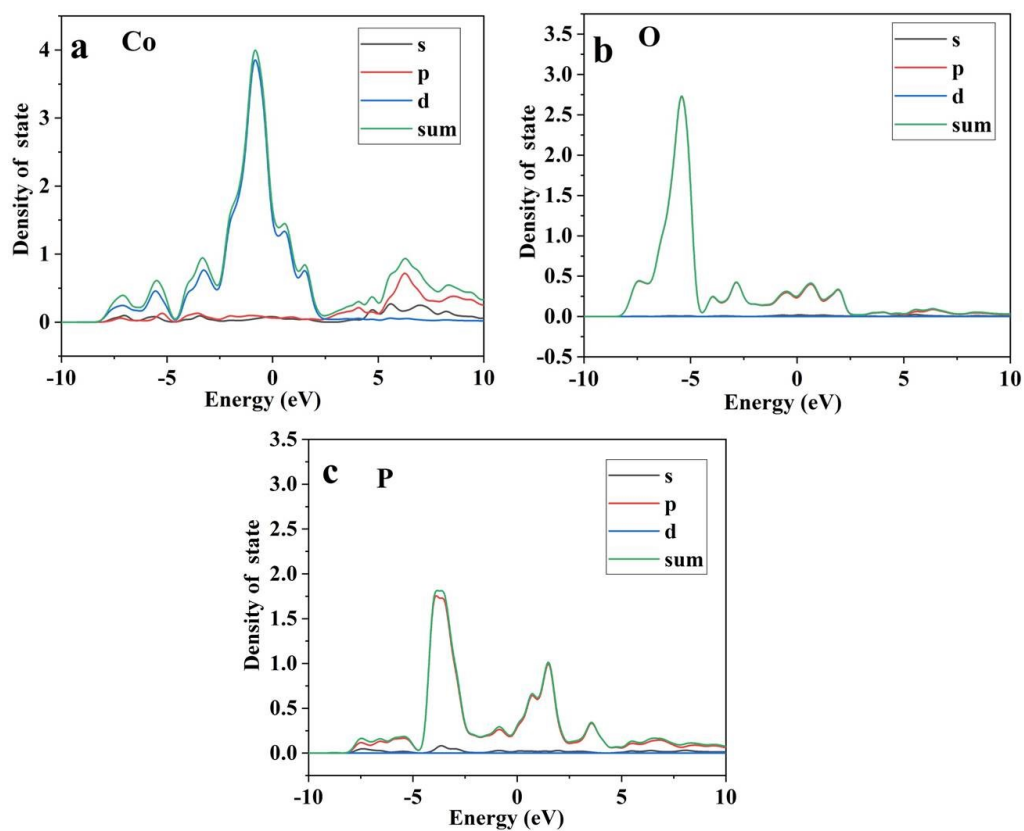

**Fig. S6** Density of states for P-Co<sub>3</sub>O<sub>4</sub>, (a) Co, (b) O and (c) P.
